# Supplementary material
Source: PubMed Central journal article supplement (PMC2685951)

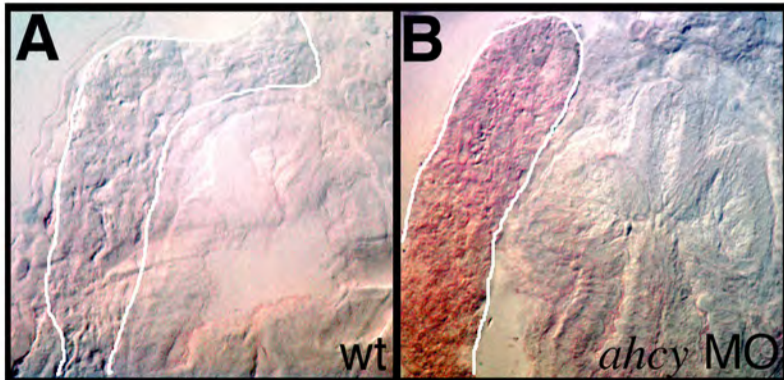

Supplement: supp_136_5_865__1.pdf [file supp_136_5_865__1.pdf]

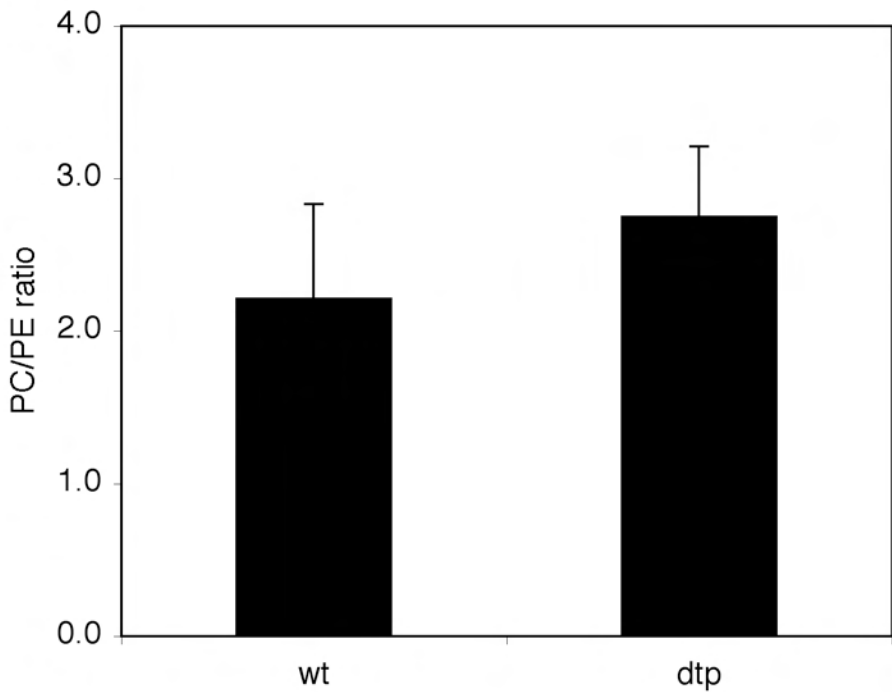

Supplement: supp_136_5_865__2.pdf [file supp_136_5_865__2.pdf]

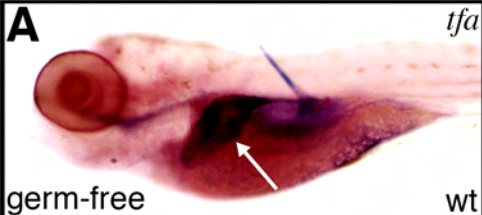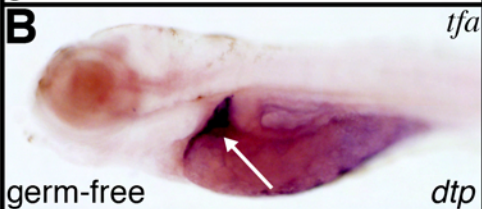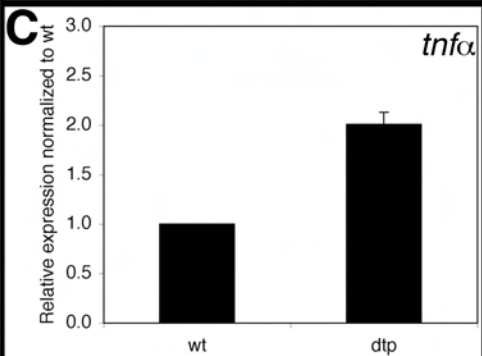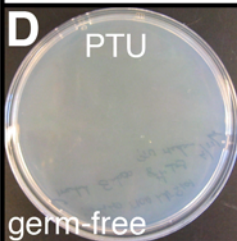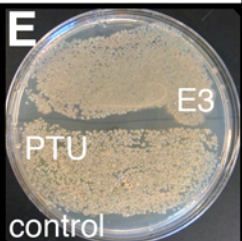

Supplement: supp_136_5_865__3.pdf [file supp_136_5_865__3.pdf]

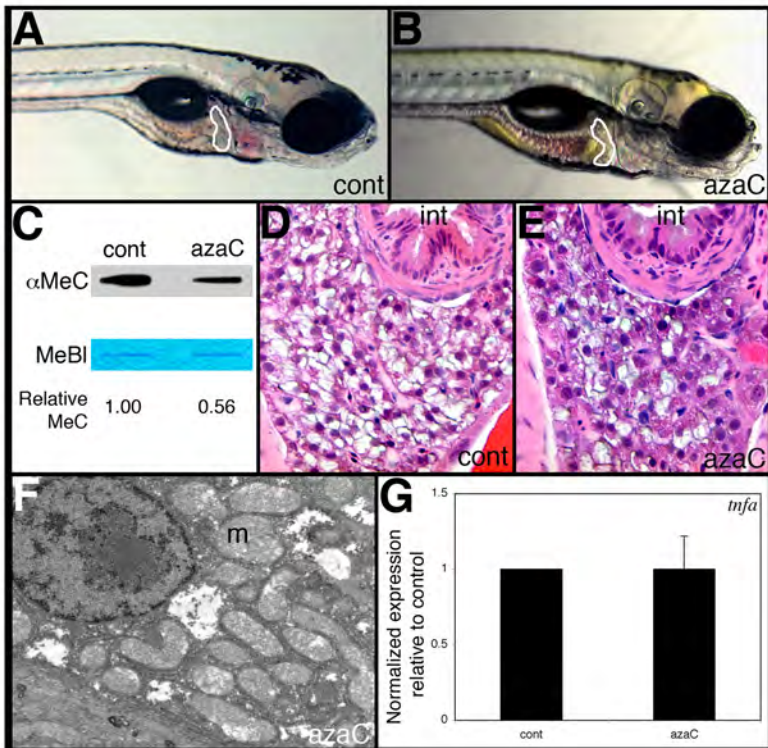

Supplement: supp_136_5_865__4.pdf [file supp_136_5_865__4.pdf]

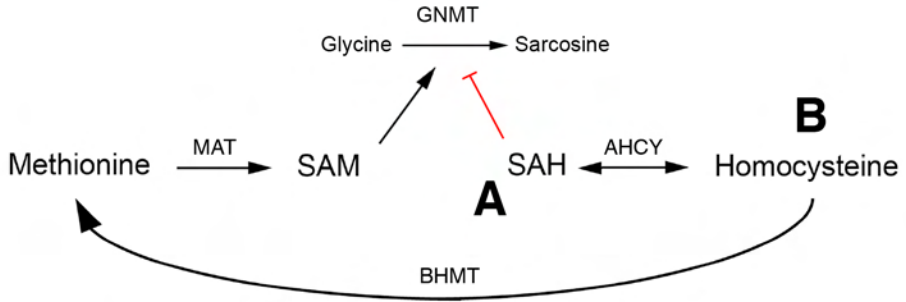

Supplement: supp_136_5_865__5.pdf [file supp_136_5_865__5.pdf]
